# Supplementary material
Source: PubMed Central journal article supplement (PMC7520716)
Supplement: NIHMS1630106-supplement-Supplemental_Figure_Legend.pdf [file NIHMS1630106-supplement-Supplemental_Figure_Legend.pdf]

## SUPPLMENTAL MATERIAL

### **Movie Legends:**

Movie 1: Echocardiography of apical HCM with an aneurysm. Zoomed in view of the apical aneurysm to clearly identify the wall

Movie 2: CMR of apical HCM with a small apical aneurysm. Balanced steady-state free precession (B-SSFP) cine imaging demonstrating increased apical wall thickness with a small apical aneurysm

Movie 3: Apically displaced prominent papillary muscle on echocardiography

Movie 4: Apically displaced prominent papillary muscle on CMR
